# Supplementary material for: Graphene oxide monolayers as atomically thin seeding layers for atomic layer deposition of metal oxides
Source: Royal Society of Chemistry journal article supplement (doi:10.1039/c5nr01128k), 2015-01-01
Supplement: c5nr01128k1.pdf [file c5nr01128k1.pdf]

Supplementary Information:

## Graphene oxide monolayers as atomically thin seeding layers for atomic layer deposition of metal oxides

Amirhasan Nourbakhsh,<sup>a, b,\*</sup> Christoph Adelman,<sup>a</sup> Yi Song,<sup>b</sup> Chang Seung Lee,<sup>c</sup> Inge Asselberghs,<sup>a</sup> Cedric Huyghebaert,<sup>a</sup> Simone Brizzi,<sup>d</sup> Massimo Tallarida,<sup>d,‡</sup> Dieter Schmeißer,<sup>d</sup> Sven Van Elshocht,<sup>a</sup> Marc Heyns,<sup>a</sup> Jing Kong,<sup>b</sup> Tomás Palacios<sup>b</sup> and Stefan De Gendt<sup>a</sup>

<sup>a</sup> imec, Kapeldreef 75, B-3001 Leuven, Belgium

<sup>b</sup> Department of Electrical Engineering and Computer Sciences, Massachusetts Institute of Technology, 77 Mass Avenue, Cambridge, Massachusetts 02139, United States

<sup>c</sup> Material and Device Research Center, Samsung Advanced Institute of Technology, Giheung-gu, Yongin-si Gyeonggi-do, 446-712, South Korea

<sup>d</sup> Brandenburgische Technische Universität, Angewandte Physik—Sensorik, Konrad-Wachsmann-Allee 17, 03046 Cottbus, Germany

### Experimental methods:

Graphene synthesis was carried out via CVD on Cu (foils and thin films) using methane as the carbon source. Graphene sheets were transferred to SiO<sub>2</sub>/Si substrates by etching Cu with FeCl<sub>3</sub> solution to release graphene. Poly(methyl methacrylate) (PMMA) was used to support and transfer graphene to the target substrates. The PMMA layer was then removed by acetone followed by heating in a hydrogen/argon atmosphere at 350 °C. Repeated transfers were done to obtain double layer graphene stacks.

O<sub>2</sub> plasma treatment was done in a parallel-plate 13.57 MHz rf plasma chamber. A plasma pulse was defined as a linear increase of the power from 0 to 100 W in 3.3 s followed by 1 s at 100 W (O<sub>2</sub> pressure in the chamber at 20 mTorr). To avoid the physical impact of the plasma due to the direct collision of charged particles and the graphene surface, samples were placed upside down in the afterglow discharge, 1 cm above the lower plate and ~2 cm below the center of discharge. The samples were annealed in an inert atmosphere at 200 °C for 2 h after each plasma exposure to desorb weakly bonded oxygen species.

SRPES was performed using soft x-ray photons with photon energies of  $h\nu = 450$  and  $640$  eV for C 1s and O 1s, respectively, at the U49-2/PGM-2 beamline at the BESSY II synchrotron facility within the Helmholtz-Zentrum Berlin.

ALD  $\text{Al}_2\text{O}_3$  was carried out with a Cambridge NanoTech ALD system using trimethylaluminum (TMA) and  $\text{H}_2\text{O}$  vapor at  $150$  °C with TMA being the first pulse. A single ALD cycle consisted of a  $30$  ms TMA exposure,  $15$  s  $\text{N}_2$  purge, a  $30$  ms  $\text{H}_2\text{O}$  exposure, and another  $15$  s purge. The growth rate on GO was  $0.95$  Å/cycle, no significant difference was observed between different degrees of oxidation of GO.

DFT calculations were carried out using the self-consistent pseudopotential method as implemented in the SIESTA code<sup>1,2</sup> with the generalized gradient approximation and the Perdew–Burke–Ernzerhof exchange–correlation functional. Atomic geometries are relaxed with forces  $<0.02$  eV/Å and stresses  $<0.05$  GPa. We employed a 3D unit cell in which SLG is isolated by a  $15$  Å vacuum, large enough to ensure negligible interaction between functionalized graphene and its periodic images.

### **Leakage current characteristics:**

Figure S1(a) compares the leakage currents of the two graphene- $\text{Al}_2\text{O}_3$ -metal (GIM) capacitors described in Figure 4(a) where one has a GO ALD seeding layer (as explained in the main text), and the other is non-oxidized (pristine) graphene. A  $10$ -nm layer of  $\text{Al}_2\text{O}_3$  was deposited by ALD on both samples. The GO/ $\text{Al}_2\text{O}_3$  devices showed low leakage currents with an oxide breakdown voltage  $V_{br} \approx 5$  V. As expected for the case of graphene/ $\text{Al}_2\text{O}_3$ , the leakage current was many orders of magnitudes larger indicating the very poor quality of the deposited  $\text{Al}_2\text{O}_3$  dielectric. This can be attributed to the relatively inert pristine graphene surface that prevents nucleation during ALD. Nucleation can only occur at defect sites, rather than over the whole graphene surface. This can be seen in the AFM image of Figure S1(b), which shows the non-uniform deposition of the  $\text{Al}_2\text{O}_3$  film and a large number of pinholes. Some of these pinholes penetrate the whole film creating leakage paths. These results are similar to those previously reported by Wang et al.<sup>3</sup>

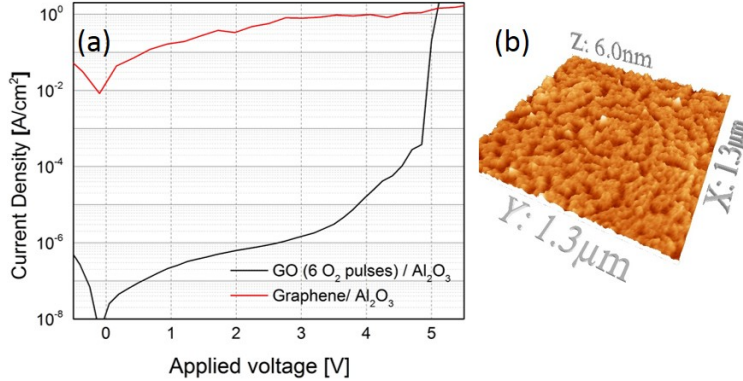

Figure S1. (a) Leakage current characteristics of GIM capacitors with GO/Al<sub>2</sub>O<sub>3</sub> and graphene/Al<sub>2</sub>O<sub>3</sub>. (b) AFM images of ~10 nm thick Al<sub>2</sub>O<sub>3</sub> deposited on graphene.

In this work ALD of Al<sub>2</sub>O<sub>3</sub>, which has a very efficient and self-limiting surface reaction, was developed as a representative model for the family of commonly used dielectric metal oxides MO<sub>x</sub>, (e.g., M = Al, Hf, Zr). The main driving force for efficient reaction of the metal precursor with the surface is the formation of a strong metal–oxygen bond. The oxygen functionalized graphene surface can be expected to allow seeding of other metal oxides by the same ALD chemistry. An interesting example is HfO<sub>2</sub> which has higher dielectric constant than Al<sub>2</sub>O<sub>3</sub> and is widely used in CMOS technology. Figure S2(a) shows an AFM image of a HfO<sub>2</sub> film deposited on GO (6 O<sub>2</sub> pulse), using 100 ALD cycles at 250 °C, where each cycle consisted of a 100 ms tetrakis(ethylmethylamino)hafnium (TEMAH) exposure, 15 s N<sub>2</sub> purge, a 20 ms H<sub>2</sub>O exposure, and another 15 s purge. Figure S2(a) compares leakage current characteristics of GIM capacitors with Al<sub>2</sub>O<sub>3</sub> and HfO<sub>2</sub> dielectric films. The HfO<sub>2</sub> GIM has a relatively high leakage current at voltages greater than 1 V and smaller  $V_{br}$  than the Al<sub>2</sub>O<sub>3</sub> GIM (3.9 vs 5 V). The AFM image in Figure S2(b) shows that a HfO<sub>2</sub> film was uniformly deposited on GO to form a closed film. These results are in agreement with reports on conventional Al<sub>2</sub>O<sub>3</sub> and HfO<sub>2</sub> metal-insulator-metal (MIM) capacitors.<sup>4</sup> The higher leakage current in the HfO<sub>2</sub> device can be attributed to the relatively smaller band gap of HfO<sub>2</sub> as compared to Al<sub>2</sub>O<sub>3</sub> which results in smaller band offset energies between the graphene electrode and dielectric.

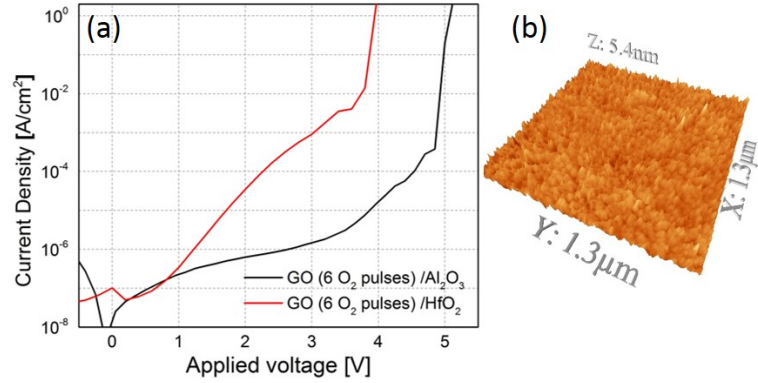

Figure S2. (a) Leakage current characteristics of GIM capacitors with GO/Al<sub>2</sub>O<sub>3</sub> and GO/HfO<sub>2</sub>. (b) AFM images of ~10 nm thick HfO<sub>2</sub> deposited on fully oxidized GO (6 O<sub>2</sub> plasma pulses).

### References:

- 1 P. Ordejon, E. Artacho and J. M. Soler, *Phys. Rev. B: Condens. Matter*, 1996, **53**, 10441–10444.
- 2 J. M. Soler, E. Artacho, J. D. Gale, A. Garcia, J. Junquera, P. Ordejon and D. Sanchez-Portal, *J. Phys.: Condens. Matter*, 2002, **14**, 2745–2779.
- 3 X. Wang, S.M. Tabakman and H. Dai, *J. Am. Chem. Soc.*, 2008, **130**(26), 8152–8153
- 4 Park, K. Ryu, J. Jeong and J. Ahn, *IEEE Electron Device Lett.*, 2013, **34**, 120–122
